# Supplementary material for: Theoretical insight into hydroxyl production via H2O2 decomposition over the Fe3O4(311) surface
Source: Royal Society of Chemistry journal article supplement (doi:10.1039/d1ra06943h), 2021-01-01
Supplement: d1ra06943h1.pdf [file d1ra06943h1.pdf]

## Theoretical Insight into the Hydroxyl Production via $\text{H}_2\text{O}_2$

### Decomposition over $\text{Fe}_3\text{O}_4$ (311) Surface

Pin-Jun Lin,<sup>a</sup> Chen-Hao Yeh,<sup>b\*</sup> and Jyh-Chiang Jiang<sup>a\*</sup>

<sup>a</sup>Department of Chemical Engineering, National Taiwan University of Science and Technology, No.43, Keelung Rd., Sec.4, Da'an Dist., Taipei 10607, Taiwan.

<sup>b</sup>Department of Materials Science and Engineering, Feng Chia University, No. 100, Wenhwa Rd., Seatwen, Taichung, 40724, Taiwan

\*Corresponding author. E-mail: [jcjiang@mail.ntust.edu.tw](mailto:jcjiang@mail.ntust.edu.tw) (J.-C. Jiang)

\*Corresponding author. E-mail: [chenhyeh@fcu.edu.tw](mailto:chenhyeh@fcu.edu.tw) (C.-H. Yeh)

**Table S1.** Calculated reaction barriers ( $E_a$  in eV) and reaction energies ( $\Delta E$  in eV) for elementary reactions of  $H_2O_2$  decomposition on the  $Fe_3O_4$  (311) surface in aqueous solution.

| <b>Elementary steps</b>                | <b><math>E_a</math></b> | <b><math>\Delta E</math></b> |
|----------------------------------------|-------------------------|------------------------------|
| Molecular adsorption                   |                         |                              |
| $H_2O_{2(aq)} \rightarrow H_2O_2^*$    | -                       | -0.94                        |
| $H_2O_2^* \rightarrow 2OH^*$           | 0.52                    | -1.53                        |
| $H_2O_2^* \rightarrow H^* + OOH^*$     | 0.33                    | 0.18                         |
| Dissociate adsorption                  |                         |                              |
| $H_2O_{2(ag)} \rightarrow H^* + OOH^*$ | -                       | -1.49                        |
| $H^* + OOH^* \rightarrow 2OH^*$        | 0.15                    | -2.16                        |
| $H^* + OOH^* \rightarrow OO^* + 2H^*$  | 0.49                    | -0.06                        |

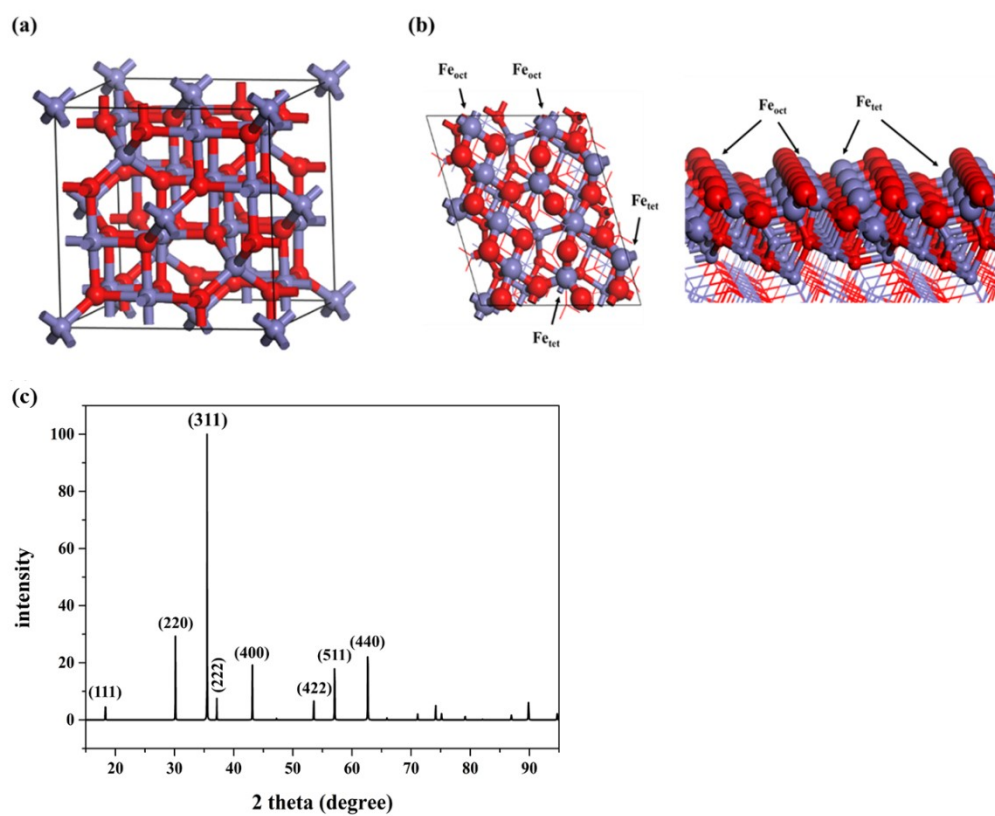

Figure S1. (a) Bulk structure of Fe<sub>3</sub>O<sub>4</sub>; (b) Top view (left) and side view (right) of Fe<sub>3</sub>O<sub>4</sub> (311) surface; (c) Simulated X-ray diffraction pattern (XRD) of Fe<sub>3</sub>O<sub>4</sub> bulk structure. Purple and red spheres represent Fe and O atoms, respectively.

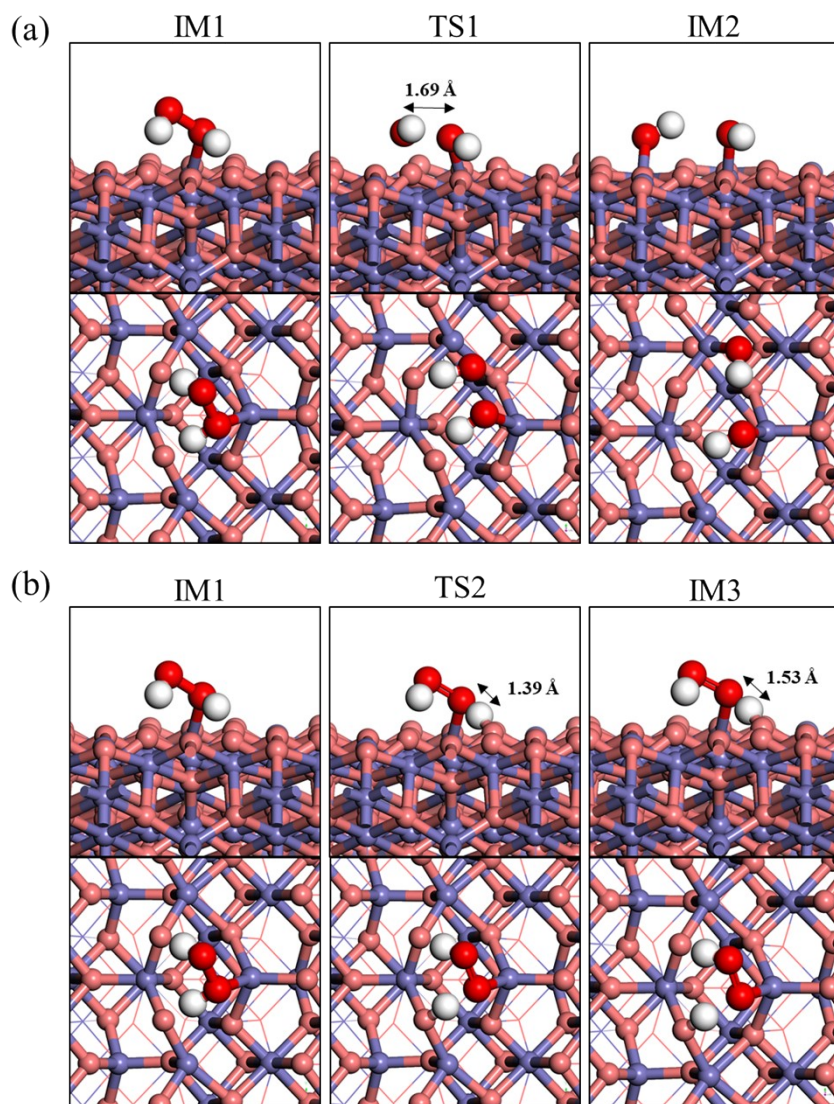

**Figure S2.** Optimized geometries of the intermediates and transition states during the decomposition of  $\text{H}_2\text{O}_2$  molecular adsorption along (a) O-O bond and (b) O-H bond dissociation pathways. Purple, red, and white spheres represent Fe, O, and H atoms, respectively. The deep red color represents the oxygen of  $\text{H}_2\text{O}_2$  while the light red color is the oxygen of  $\text{Fe}_3\text{O}_4$  (311) surface.

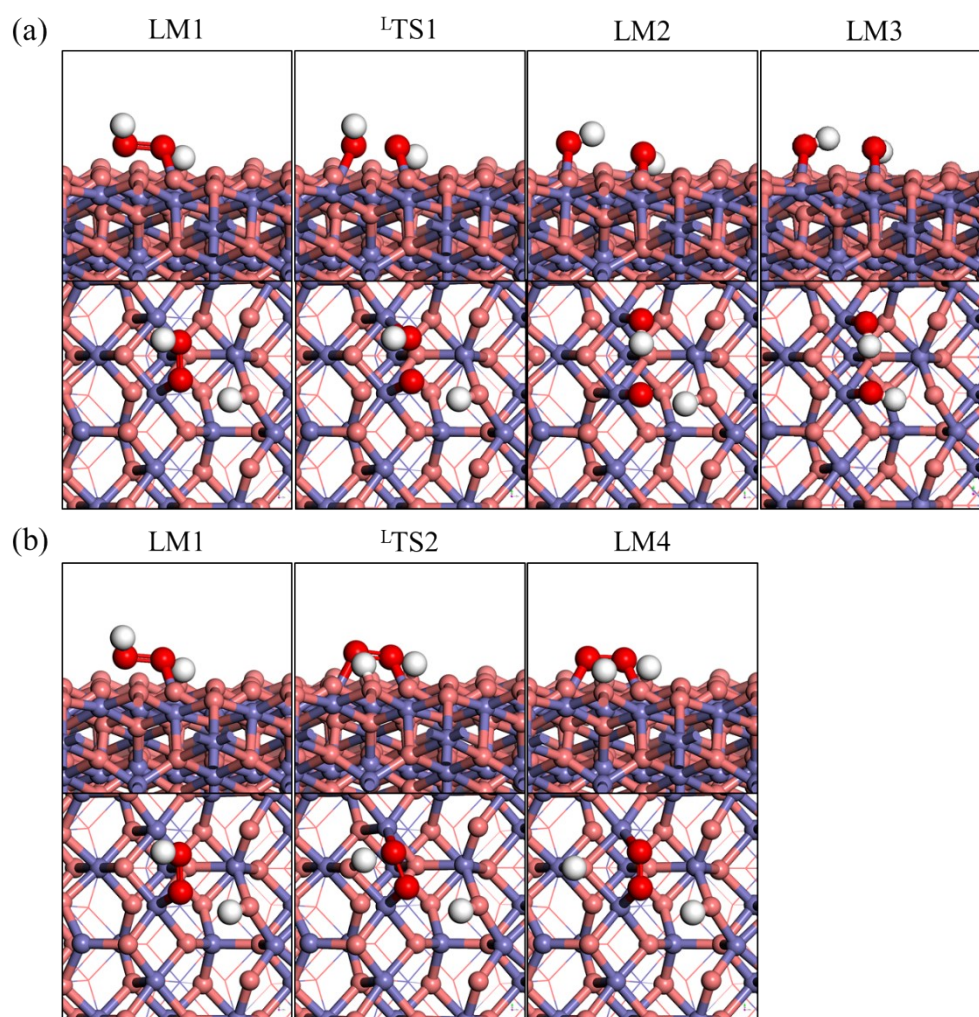

**Figure S3.** Optimized geometries of the intermediates and transition states during the decomposition of  $\text{H}_2\text{O}_2$  dissociative adsorption along (a) O-O bond and (b) O-H bond dissociation pathways. Purple, red, and white spheres represent Fe, O, and H atoms, respectively. The deep red color represents the oxygen of  $\text{H}_2\text{O}_2$  while the light red color is the oxygen of  $\text{Fe}_3\text{O}_4$  (311) surface.

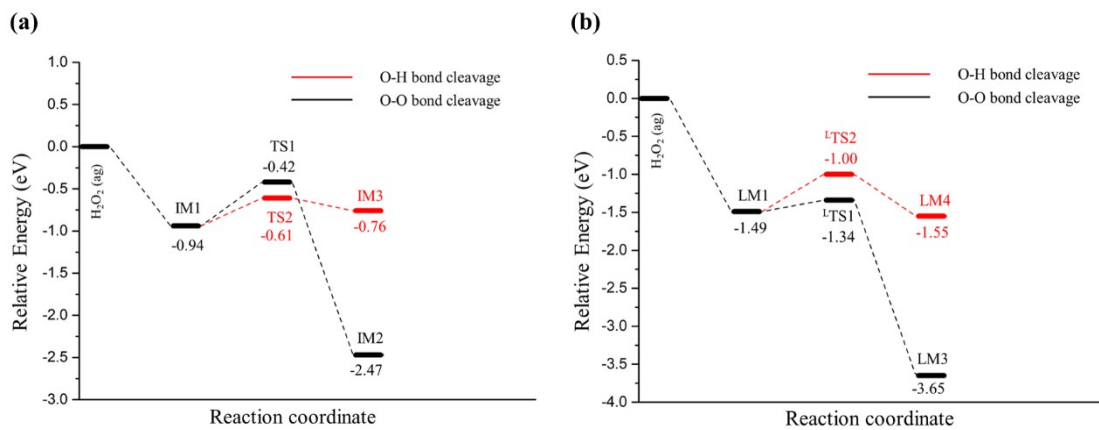

**Figure S4.** The potential energy profiles of the decomposition of H<sub>2</sub>O<sub>2</sub> on the Fe<sub>3</sub>O<sub>4</sub>(311) surface in aqueous solution via (a) H<sub>2</sub>O<sub>2</sub> molecular adsorption and (b) H<sub>2</sub>O<sub>2</sub> dissociative adsorption.

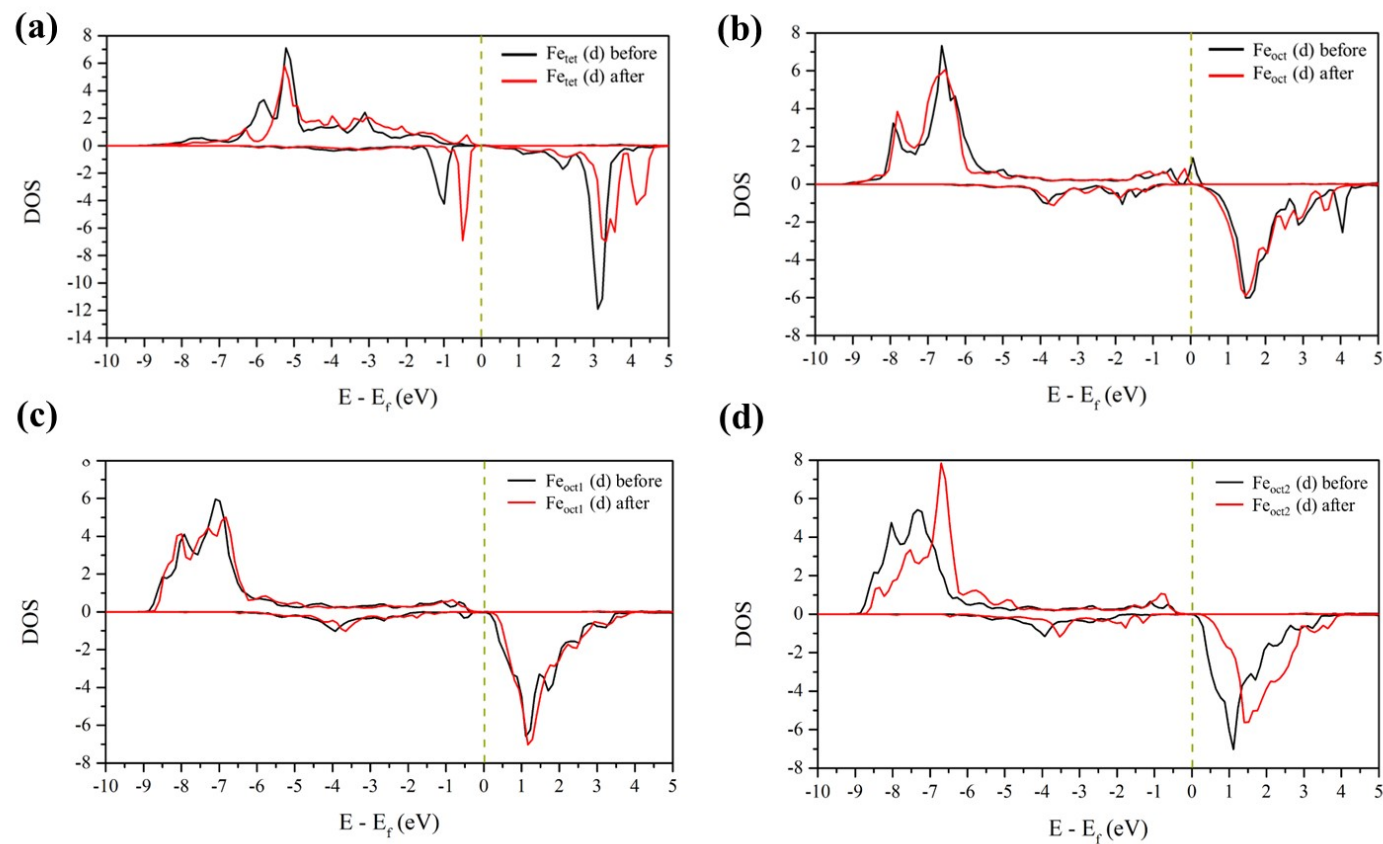

**Figure S5.** The PDOS plots of (a) d orbitals of  $\text{Fe}_{\text{tet}}$  atom and (b)  $\text{Fe}_{\text{oct}}$  atom before and after  $\text{H}_2\text{O}_2$  molecular adsorption; and the PDOS plots of (c) d orbitals of  $\text{Fe}_{\text{oct1}}$  atom and (b)  $\text{Fe}_{\text{oct2}}$  atom before and after  $\text{H}_2\text{O}_2$  dissociative adsorption. The dotted line is the fermi level.

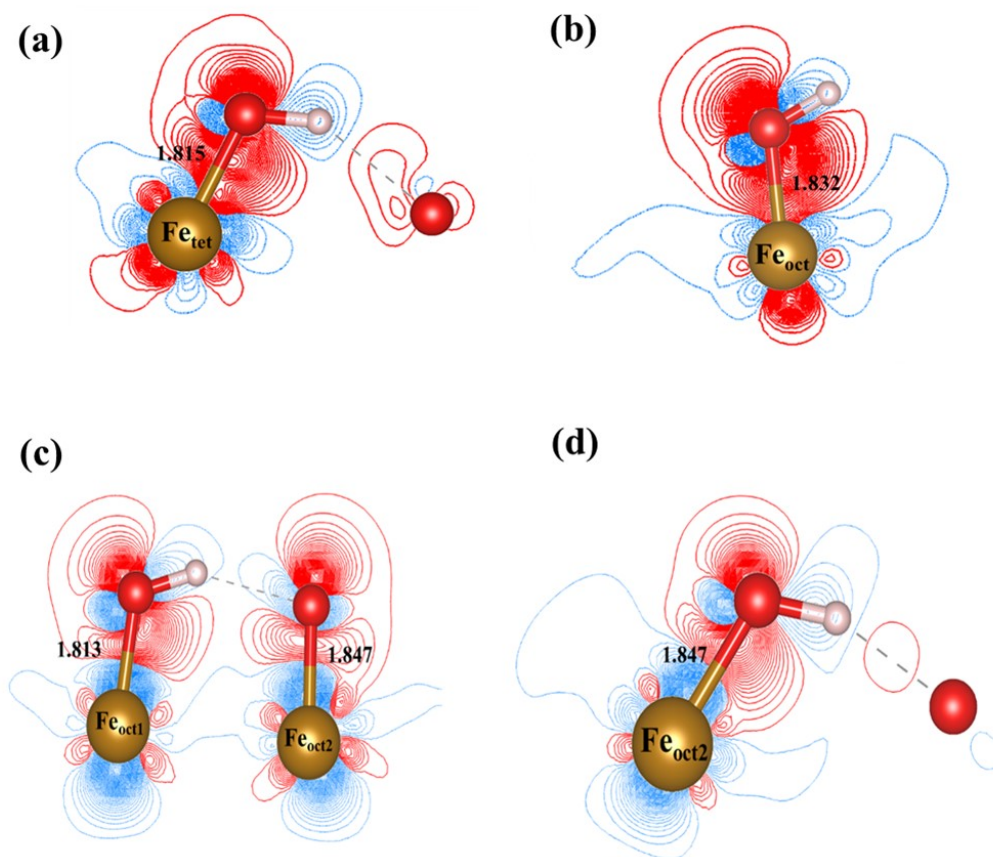

**Figure S6.** The electron density difference (EDD) plots for the OH groups on (a)  $\text{Fe}_{\text{tet}}$  and (b)  $\text{Fe}_{\text{oct}}$  atoms after the decomposition of  $\text{H}_2\text{O}_2$  molecular adsorption; the EDD plots for the OH groups on (c)  $\text{Fe}_{\text{oct1}}$  and (d)  $\text{Fe}_{\text{oct2}}$  atoms after the decomposition of  $\text{H}_2\text{O}_2$  dissociative adsorption. The isosurface level is  $0.002 \text{ |e|/Bohr}^3$ . (Red and blue lines represent electron gain and lose, respectively.) Brown, red, and white spheres represent Fe, O, and H atoms, respectively.



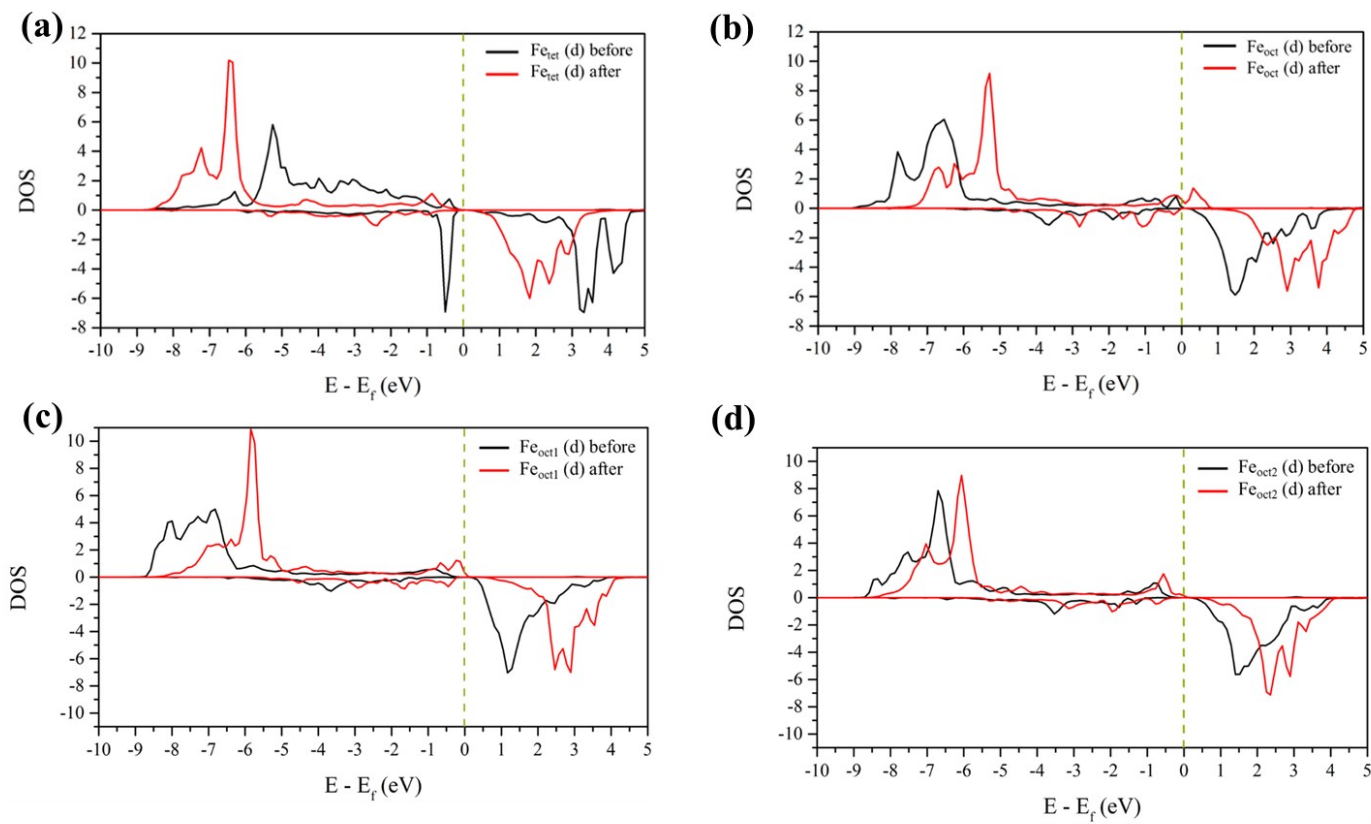

**Figure S7.** The PDOS plots of (a) d orbitals of  $\text{Fe}_{\text{tet}}$  atom and (b)  $\text{Fe}_{\text{oct}}$  atom before and after  $\text{H}_2\text{O}_2$  molecular adsorption's decomposition; and the PDOS plots of (c) d orbitals of  $\text{Fe}_{\text{oct1}}$  atom and (d)  $\text{Fe}_{\text{oct2}}$  atom before and after  $\text{H}_2\text{O}_2$  dissociative adsorption's decomposition. The dotted line is the fermi level.
